# Supplementary material for: Domain-specific expression of meristematic genes is defined by the LITTLE ZIPPER protein DTM in tomato
Source: PubMed Central journal article supplement (PMC6478692; doi:10.1038/s42003-019-0368-8), 2019-04-23
Supplement: 42003_2019_368_MOESM3_ESM.pdf [file 42003_2019_368_MOESM3_ESM.pdf]

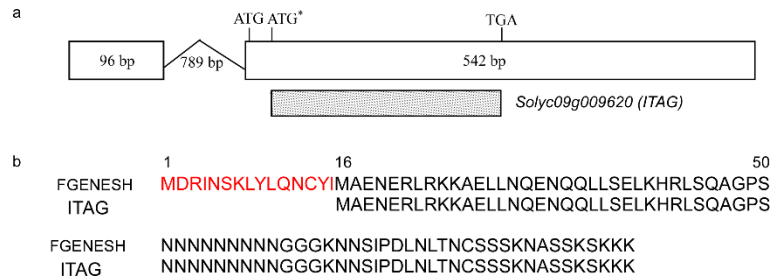

**Supplementary Fig. 1 Correction of the ITAG annotation for *Solyc09g009620*.** **a**, genomic structure of the *Solyc09g009620/DTM* gene. The ITAG-annotated *Solyc09g009620* (shaded) has single exon and the second ATG (indicated by \*) is predicted as the start codon. But, analysis of 5' RACE and 3' RACE sequences revealed that *Solyc09009620* contains two exons, and the first ATG in the second exon has been predicted as start codon by gene prediction program FGENESH. **b**, alignment of protein sequences deduced from gene prediction by FGENESH and ITAG. The 15 amino acid residues missed in ITAG-annotation are highlighted in red.

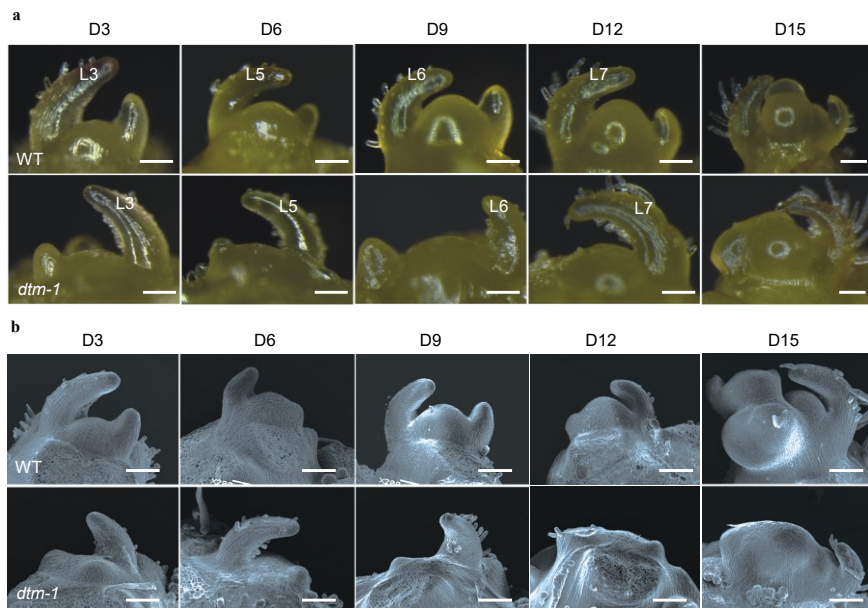

**Supplementary Fig. 2 Domining of *dtm-1* SAMs and wild type.** SAM doming was observed under a stereomicroscope (a) or by SEM (b). SAM morphology were examined every three days after germination (D3-D15 as shown above each column of micrographs), and leaves were numbered from old to young. Scale bars, 100 μm.

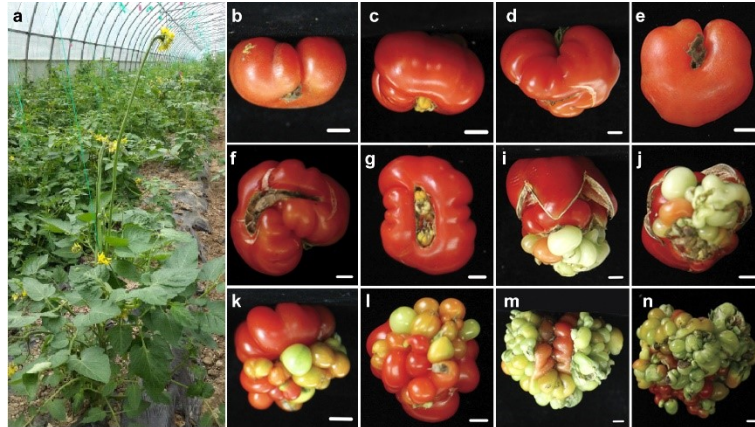

**Supplementary Fig. 3 Variations in fruit morphology observed in *dtm-1* plants of a F<sub>2</sub> population derived from a cross between *S. pimpinellifolium* LA1781 and *dtm-1*. a**, extremely elongated flower stalks found in *dtm-1* plants grown in plastic greenhouse. **b-n**, an array of *dtm-1* fruits with different severities of fasciation. Extremely elongated flower stalks (**a**) and fasciated fruits (**i-n**) were only observed in plants grown in plastic greenhouse. Scale bars, 1 cm.

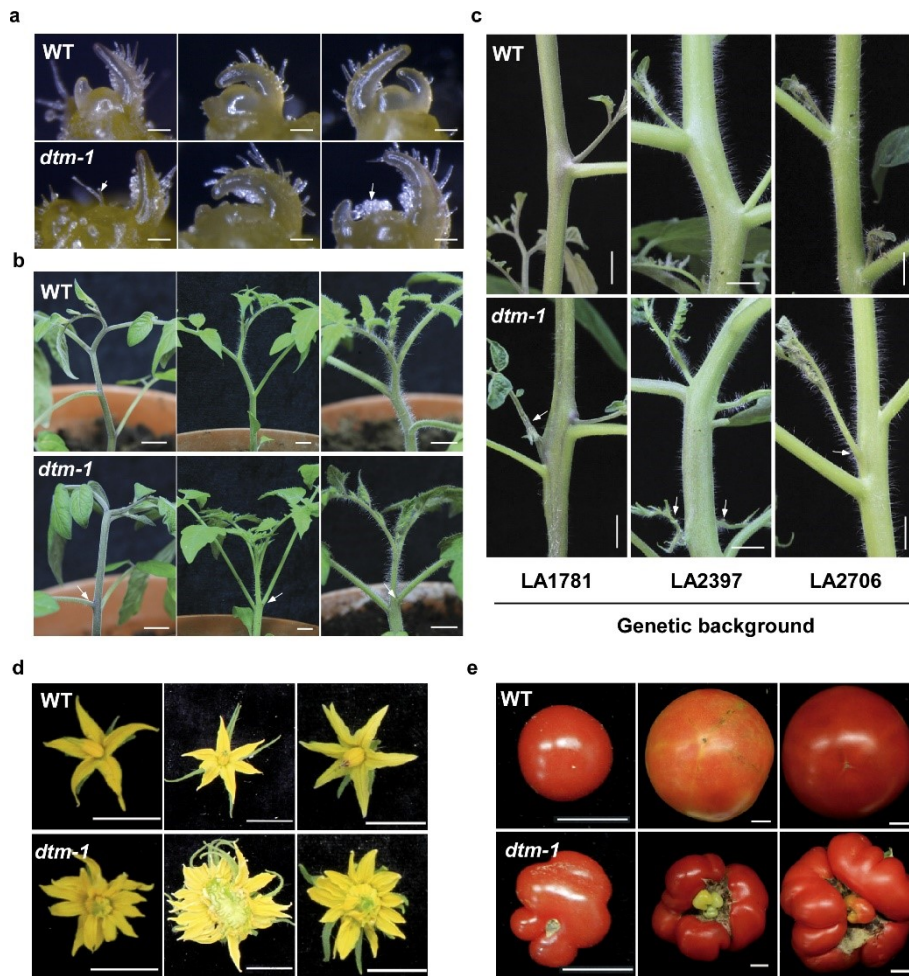

**Supplementary Fig. 4 The *dtm-1* allele impacts SAM development independent on genetic background.** **a**, images of dissected vegetative SAMs from *dtm-1* NILs in LA1781, LA2397 and LA2706 (MoneyMaker) backgrounds. Ectopic trichomes formed on the dooms were indicated by arrows. Scale bar, 100 μm. **b**, photographs showing altered leaf phyllotaxis (indicated by arrows) of *dtm-1* plants in LA1781, LA2397 and LA2706 backgrounds. Scale bar, 1 cm. **c**, photographs of shoot segments showing misformed axillary buds from *dtm-1* plants in LA1781, LA2397 and LA2706 backgrounds. **d-e**, flower and fruit phenotypes of *dtm-1* allele in LA1781, LA2397 and LA2706 backgrounds. Scale bar, 1 cm. The *dtm-1* mutant in LA2397 background was crossed to LA1781 and LA2706, and backcrossed four times to wild type parents before they are subjected to phenotypic analysis. Images in (a-e) are arranged in the same way as indicated in (c).

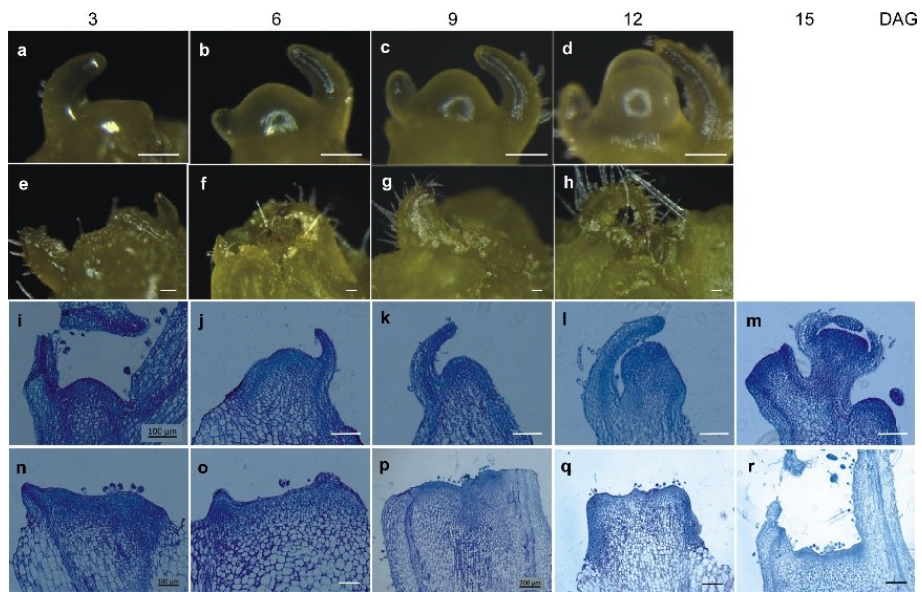

**Supplementary Fig. 5 SAM morphology of *dtm-cr5* and wild type.** **a-h**, stereomicroscopic images of *dtm-cr5* (**a-d**) and wild type (Moneymaker, **e-h**) SAMs at 3, 6, 9 and 12 days after germination (DAG). Scale bars, 100  $\mu\text{m}$ . **i-r**, paraffin sections of *dtm-cr5* (**n-r**) and wild type (**i-m**) shoot apices at 3, 6, 9, 12 and 15 DAG. Scale bars represent 100  $\mu\text{m}$  (**i-o**) and 200  $\mu\text{m}$  (**o-r**), respectively.

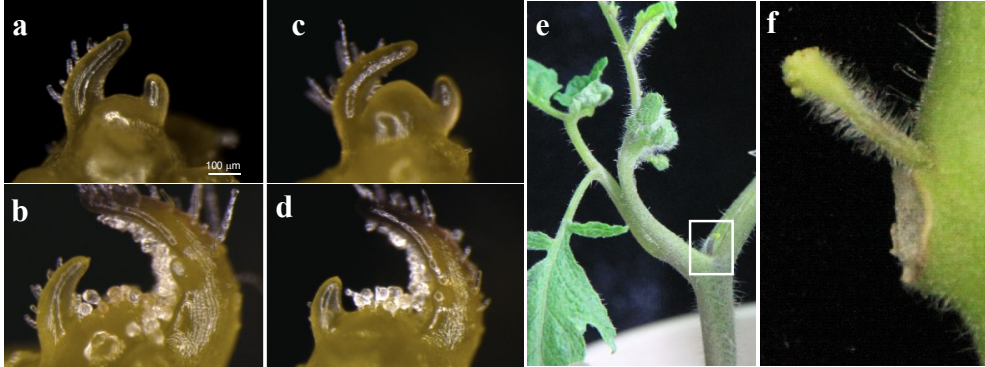

**Supplementary Fig. 6 Genetic interaction between *FAS* and *DTM*.** a-d, SAM morphology of *dtm-1* (b), *fas* (c), *dtm-1 fas* (d) and wild type (a) was examined at 6 DAG under a stereomicroscope. Scale bar, 100  $\mu$ m. e, image of *fas dtm-1* stem showing defect in axillary shoot development. f, close-up of the selected region indicated in (e) by the white rectangle. *dtm-1* in LA2397 background was crossed to cv. Super Beefsteak containing the *fas* mutation in the *SICLV3* gene, and the four genotypes were identified in F<sub>2</sub> progenies from this cross.

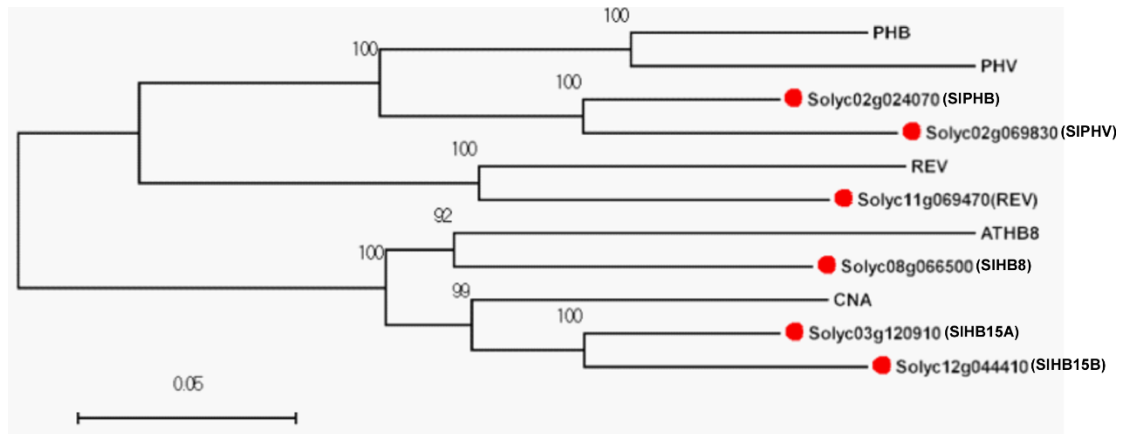

**Supplementary Fig. 7 Phylogenetic analysis of HD-ZIP III proteins from tomato and Arabidopsis by MEGA7.** The consensus phylogenetic tree was generated by 1,000 bootstrap replications. The numbers next to branches represent the percentages of the replicate trees (only 50% or higher reported) in the bootstrap test.

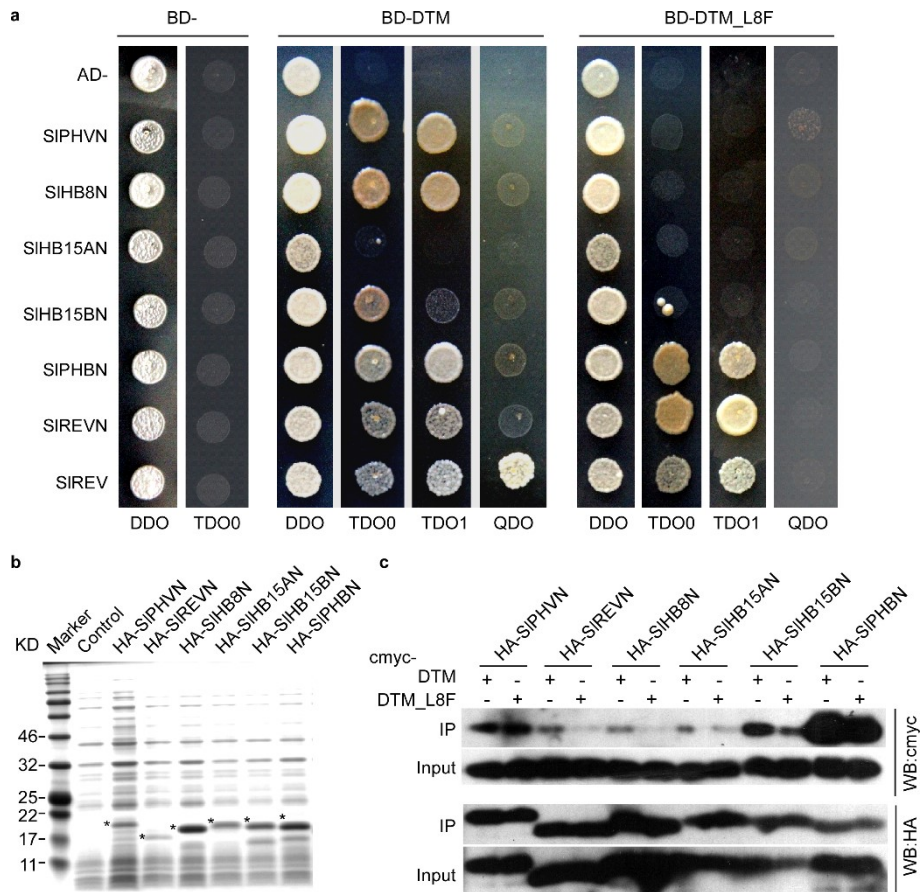

**Supplementary Fig. 8 Interactions between DTM, DTM\_L8F and the N-terminals of tomato HD-ZIP III proteins.** **a**, DTM and DTM\_L8F interacts with the N-terminals of the six tomato HD-ZIP III proteins in yeast. The full-length SIREV was included as control. **b**, expression of the N-terminal portions of individual tomato HD-ZIP IIIs in *E. coli*. The N-terminal portions of tomato HD-ZIP III proteins consist of the first 127 (SIPHV) or 132 aa (the remaining five) containing homeodomain and leucine zipper domain. \*, indicates the fusion protein induced. **c**, comparison of binding specificity between DTM and DTM\_L8F to the N-terminals of the six tomato HD-ZIP III proteins by pulldown assay. DTM and DTM\_L8F fused to cmcy were tested for their binding affinities with the N-terminal portions of HD-ZIP III proteins tagged by HA. DDO, SD-Leu-Trp; TDO0 and TDO1, SD-Leu-Trp-His with 0 and 1 mM 3-amino-1,2,4- triazole (3-AT), respectively; QDO, SD-Leu-Trp-His-Ade. IP, immunoprecipitation; WB, Western blot.



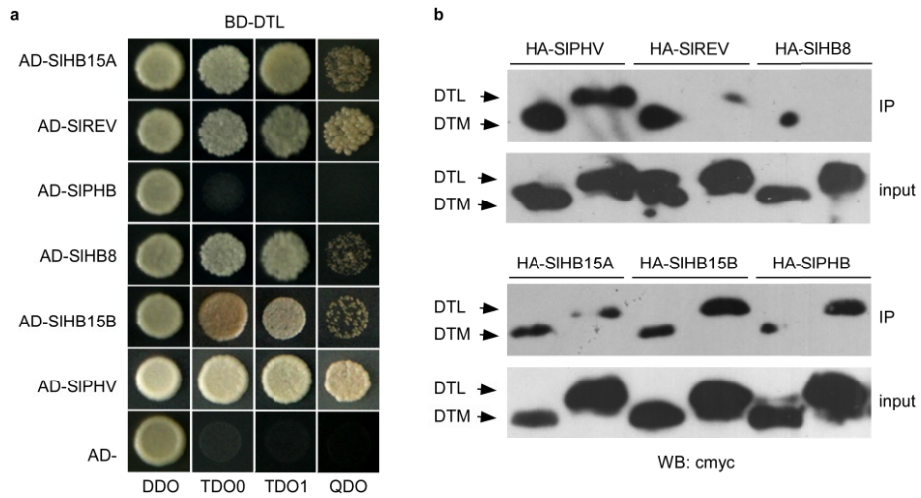

**Supplementary Fig. 9 Interactions between DTL and tomato HD-ZIP III proteins.**

**a**, DTL interacts members of tomato HD-ZIP III proteins in yeast. **b**, comparison of binding specificity between DTM and DTL to tomato HD-ZIP III proteins by pulldown assay. DTM and DTL fused to cmc were tested for their binding affinities with HD-ZIP III proteins tagged by HA. DDO, SD-Leu-Trp; TDO0 and TDO1, SD-Leu-Trp-His with 0 and 1 mM 3-amino-1,2,4- triazole (3-AT), respectively; QDO, SD-Leu-Trp-His-Ade. IP, immunoprecipitation; WB, Western blot.

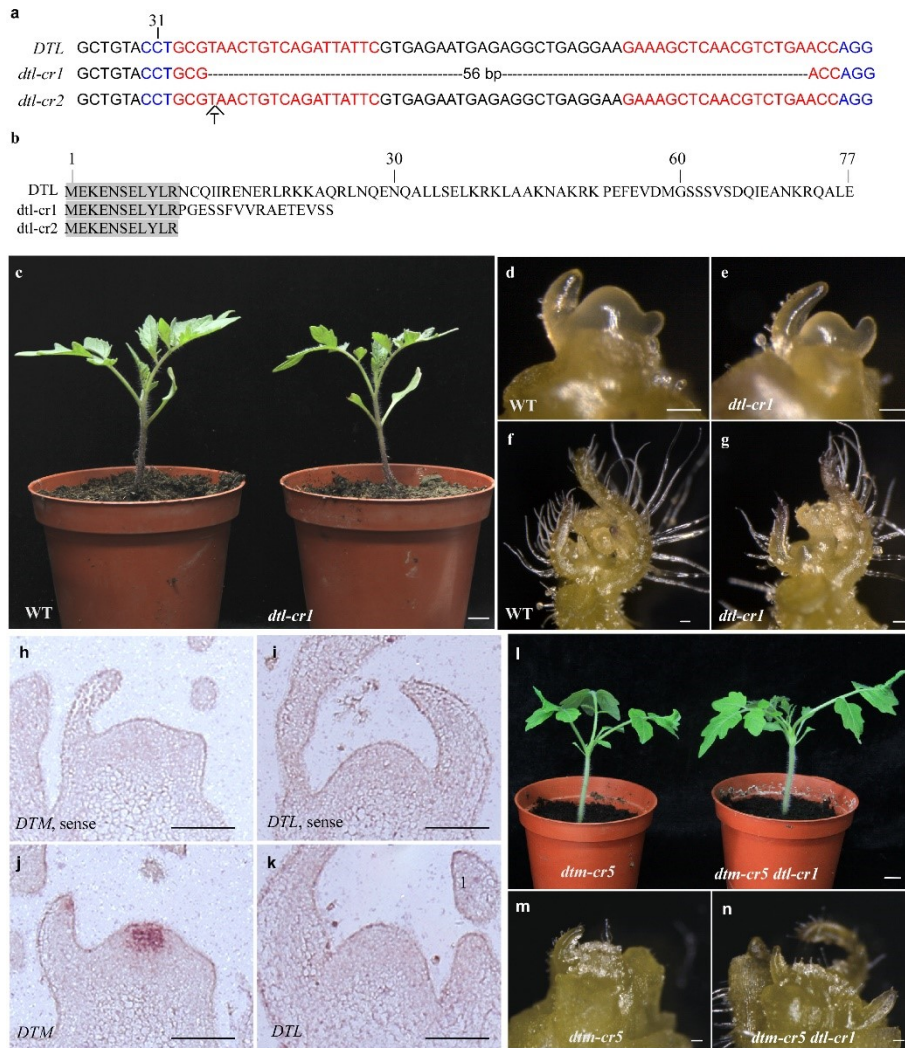

**Supplementary Fig. 10 Loss-of-function in *DTL* has no visible SAM phenotype.** **a**, two putative loss-of-function *dtl* alleles created by CRISPR-Cas9 were identified by Sanger sequencing. The two gRNA target sequences are highlighted in red. **b**, deduced amino acid sequences encoded by the two edited alleles *dtl-cr1* and *dtl-cr2*. Identical sequences between the mutants and wild type *DTL* are shaded in grey. **c**, images of *dtl-cr1* and wild type seedlings. **d-g**, SAM morphology of *dtl-cr1* (**e, g**) and wild type (**d, f**) at vegetative (**d, e**) and reproductive phases (**f, g**). **h-k**, *DTM* and *DTL* expression in SAMs at 6 days after germination (DAG). **l-n**, seedling (**l**) and SAM (**m, n**) phenotypes of *dtm-cr5* and *dtm-cr5 dtl-cr1*. The double mutant *dtm-cr5 dtl-cr1* displayed the same developmental defects with *dtm-cr5* in SAM development and leaf phyllotaxis. Scale bars represent 1 cm (**c, l**) and 100  $\mu$ m (**d-k, m, n**), respectively.

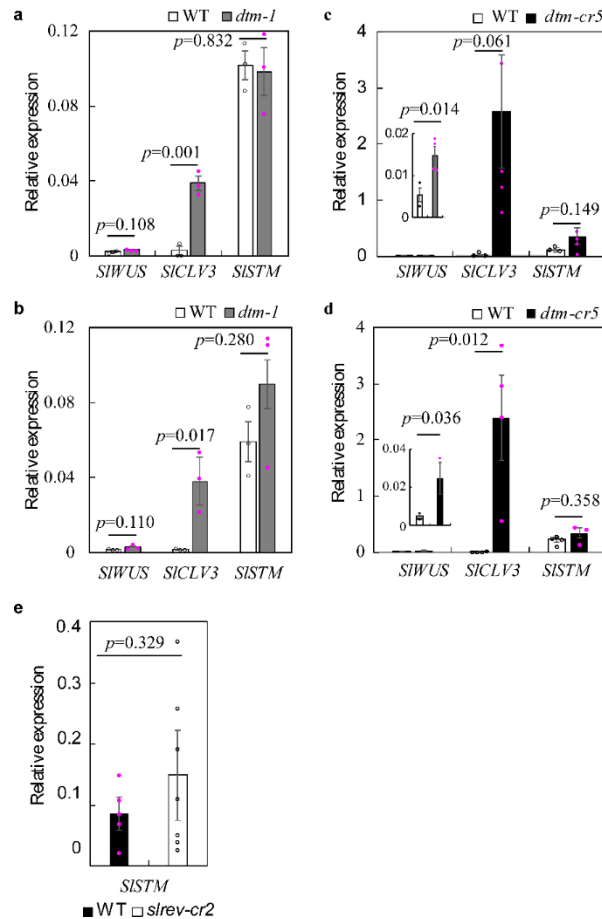

**Supplementary Fig. 11 Expression levels of meristematic genes in the shoot apices of *dtm-1*, *dtm-cr5*, *slrev-cr2* and their wild types. a-d**, relative expression levels of meristematic genes *SICLV3*, *SIWUS* and *SISTM* in the shoot apices of *dtm-1* (a, b) and *dtm-cr5* (c, d) seedlings at 3 (a, c) and 9 (b, d) DAG. e, *SISTM* expression in *slrev-cr2* and wild type (Moneymaker) shoot apices at 6 DAG. The experiments were repeated at least twice using different batches of plants with similar results. Data are reported as means  $\pm$  SE of three-seven biological replicates. A Welch's t-test (comparison between two groups with unequal sample sizes) or two tailed t-test was applied to compare the differences in means between mutant and wild type. LA2397 and Moneymaker (LA2706) were used as respective wild type control of *dtm-1* and *dtm-cr5*. Individual measurements of expression relative to that of reference gene *SleIF4 $\alpha$ 6* were indicated by dots or small cycles. Expression data collected from *dtm-1* and *dtm-cr5* apices at 6 DAG are presented in Fig. 7c, d.

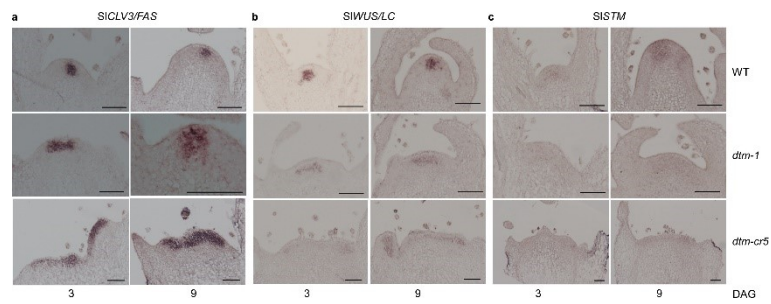

**Supplementary Fig. 12 Expression patterns of meristematic genes in the shoot apices of *dtm* mutants and wild type revealed by *in situ* hybridization.** Expression of *SICLV3* (a), *SIWUS* (b) and *SISTM* (c) in the shoot apices of *dtm-1*, *dtm-cr5* and wild type (Moneymaker) at 3 and 9 DAG. Scale bars, 100  $\mu$ m. Data collected from the seedlings at 6 DAG are provided in **Fig. 7e**.

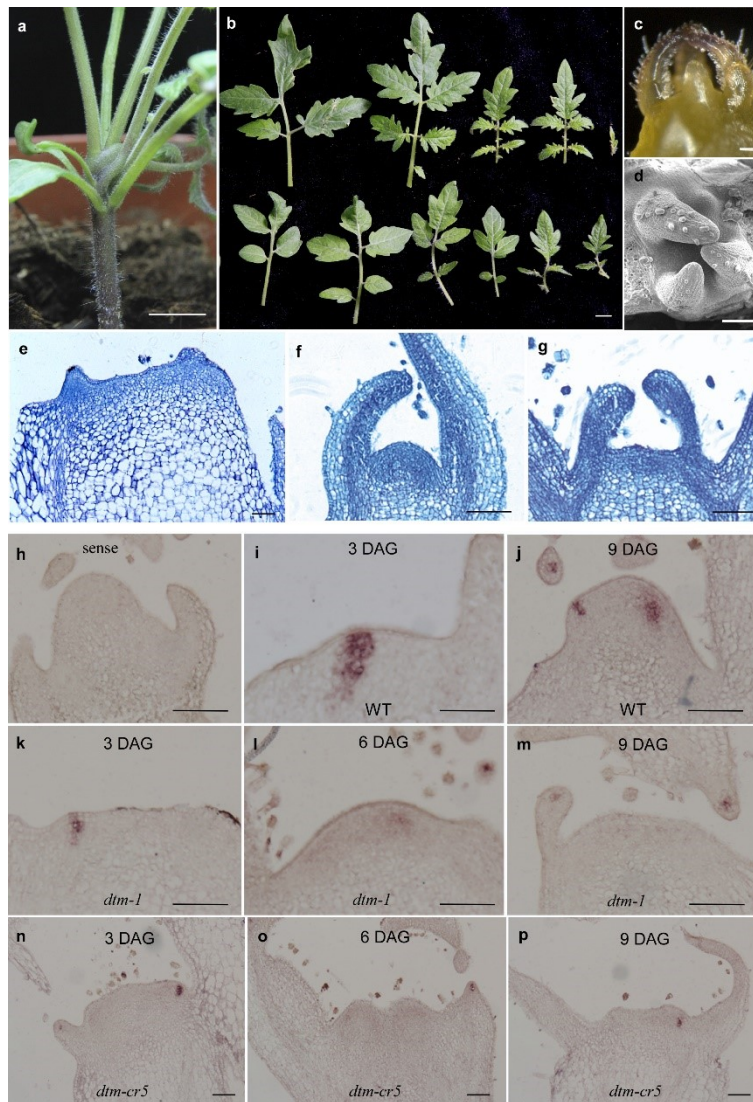

**Supplementary Fig. 13 *DTM* is involved in regulation of leaf initiation.** **a**, an image showing multiple leaves clustered at the top of the seedlings. Scale bar, 1 cm. **b**, leaf development in *dtm-cr5* and wild type. Leaves were dissected from three-week-old plants. Scale bar, 1 cm. **c-e**, early leaf initiation in *dtm-cr5* seedlings by stereomicroscopy (**c**), SEM (**d**) and parafilm section (**e**). Scale bar, 100  $\mu$ m. **f**, parafilm section of wild type apices at 6 DAG. **g**, parafilm section of *dtm-1* apices at 6 DAG. Scale bars, 100  $\mu$ m. **h-p**, *LFS* expression by RNA *in situ* hybridization in the shoot apices of *dtm* mutants and wild type at 3, 6 and 9 DAG. Scale bars, 100  $\mu$ m.

Blots used in Fig 4c

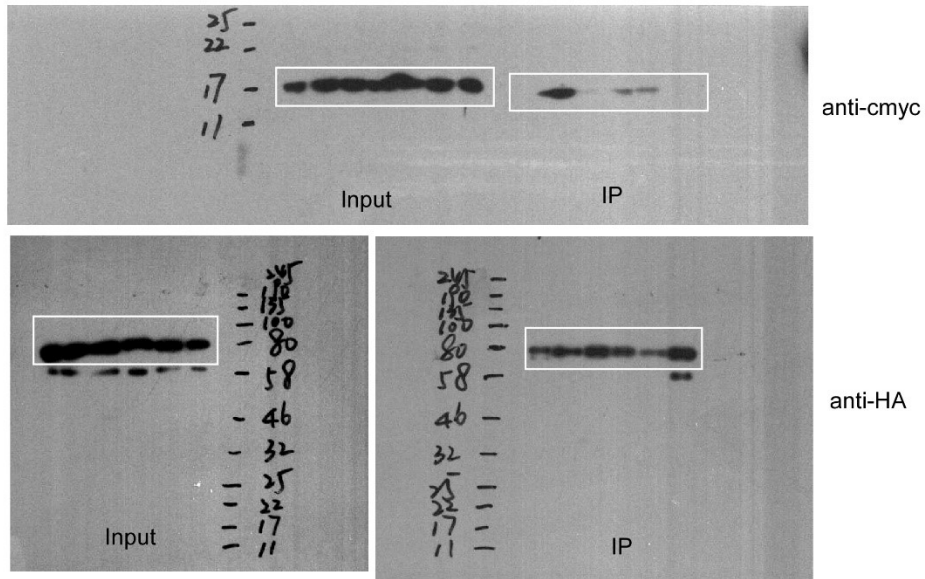

Blots used in Fig 4d

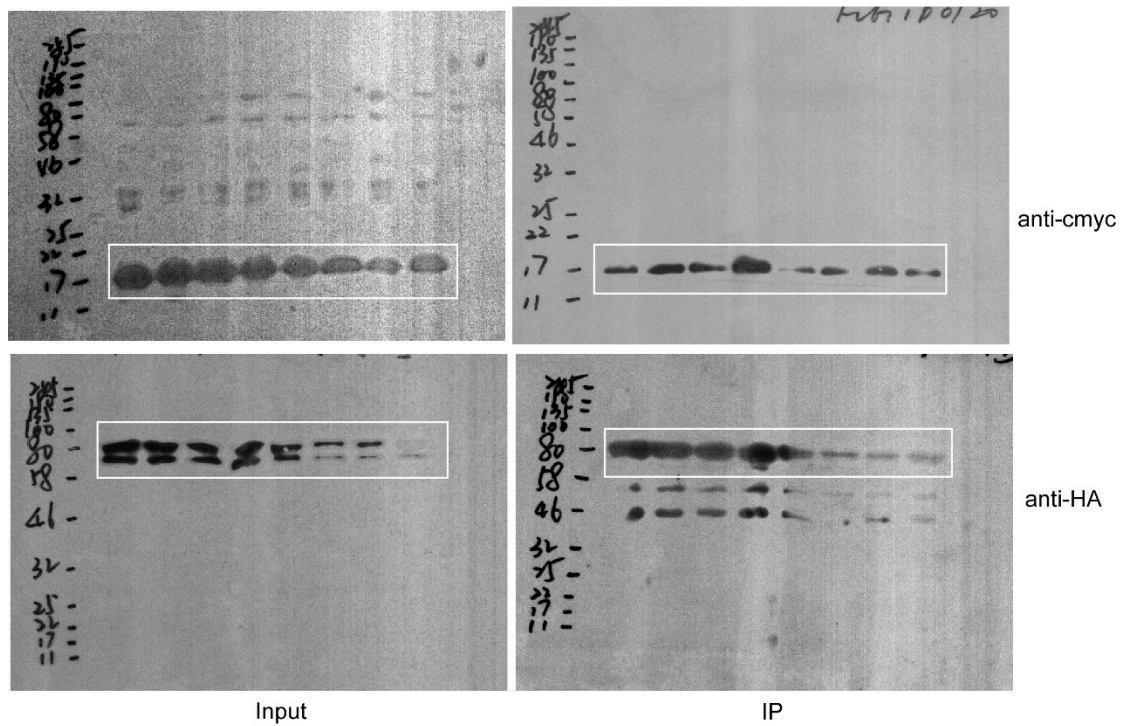

#### Supplementary Figure 14 Original blot images used in Fig. 4

The panels boxed were used in Fig. 4c,d. The size (kDa) of the marker proteins are marked on the left or right of each image.

Blots used in Fig 5c

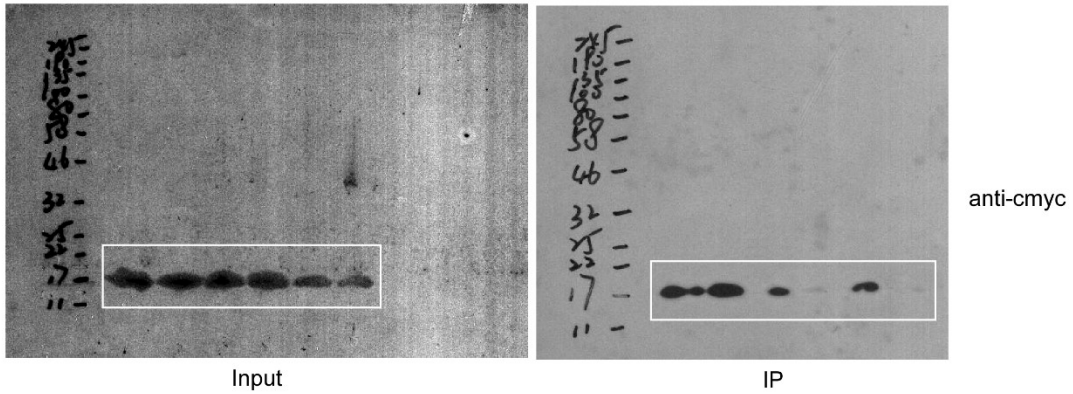

Blots used in Fig 5d

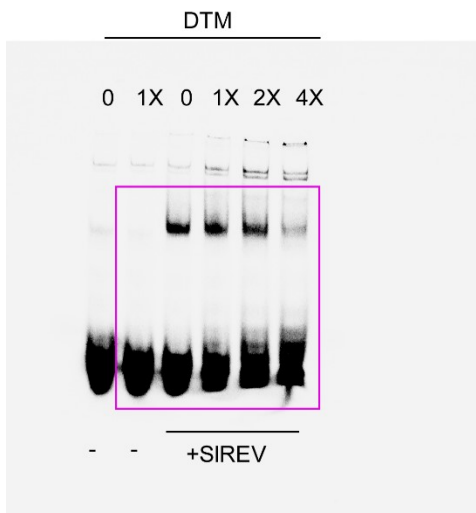

Blots used in Fig 5e

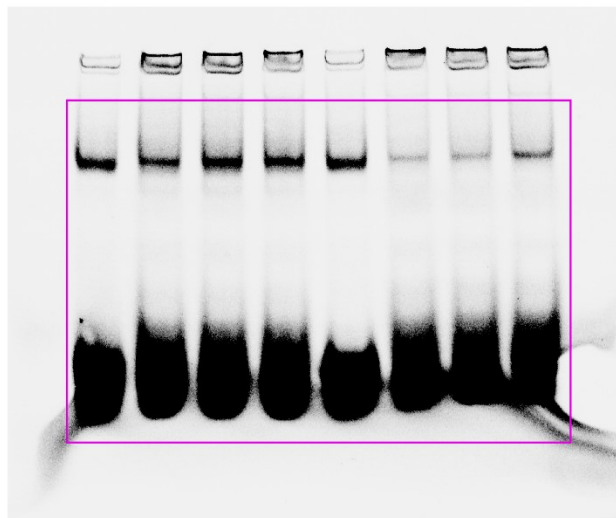

### Supplementary Figure 15 Original blot images used in Fig. 5

The panels boxed were used in Fig. 5c-e. The size (kDa) of the marker proteins are marked on the left of each image.

Blots used in Supplementary Fig 8b

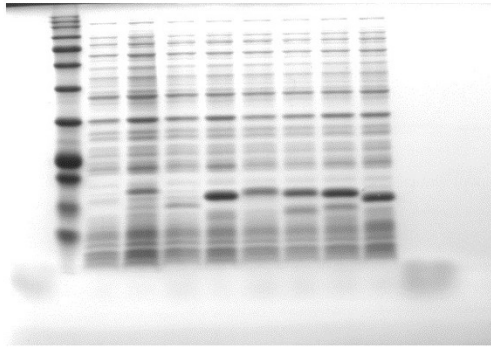

Blots used in Fig 8c

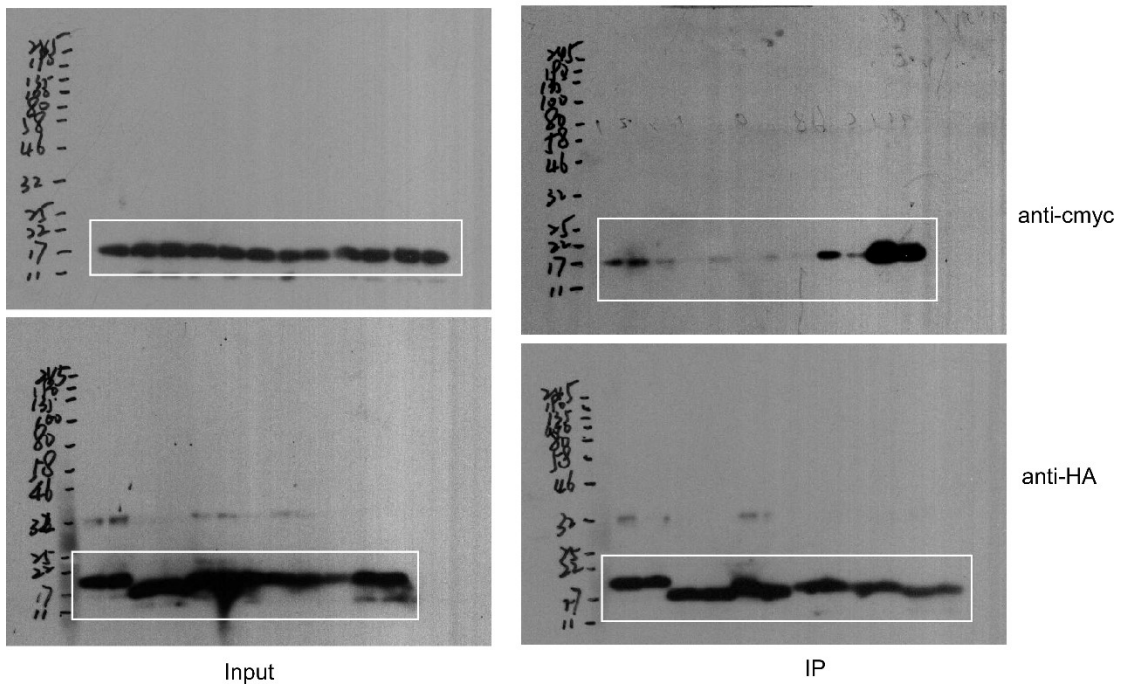

**Supplementary Figure 16 Original blot images used in Supplementary Fig. 8**

The panels boxed were used in Supplementary Fig. 8b,c. The size (kDa) of the marker proteins are marked on the left or right of the images.



Blots used in Supplementary Fig 9b

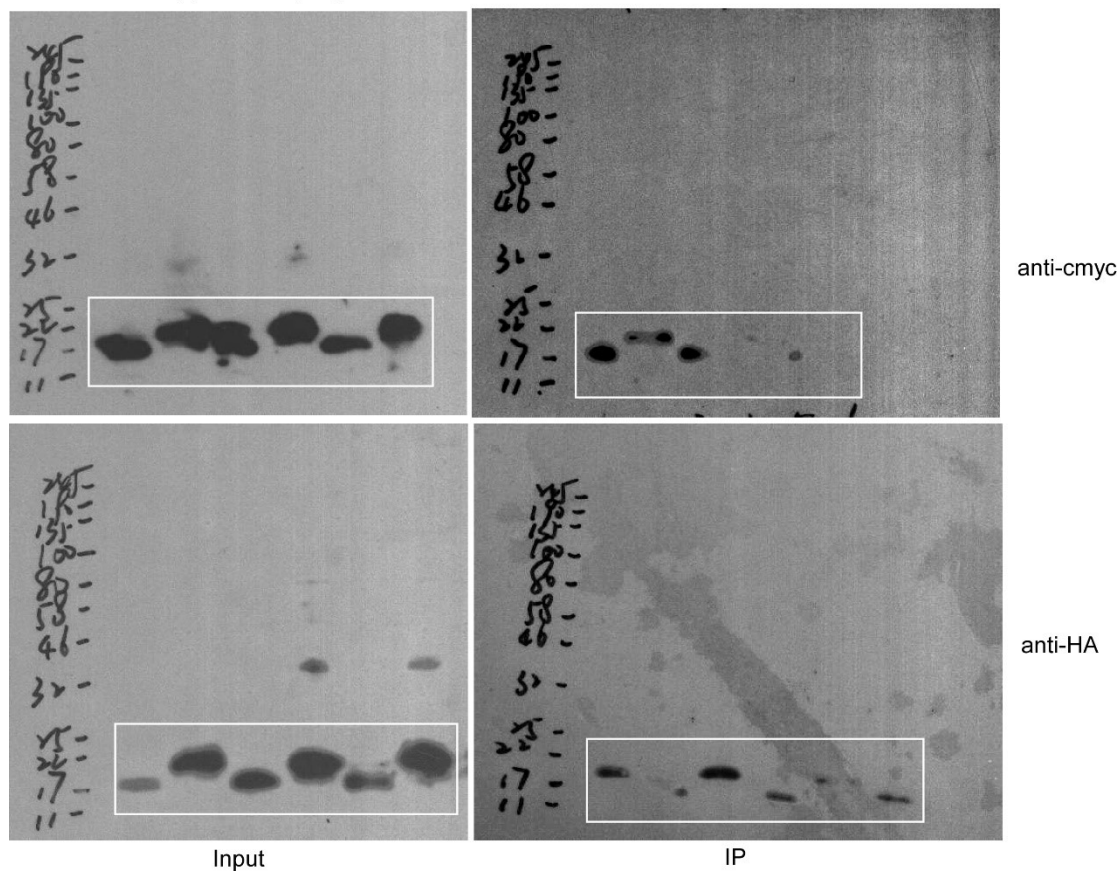

**Supplementary Figure 17 Original blot images used in Supplementary Fig. 9**

The panels boxed were used in Supplementary Fig. 9b. The size (kDa) of the marker proteins are marked on the left of each image.

**Supplementary Table 1 Mapping markers used in this study**

| Marker  | Forward primer sequence (5'-3') | Reverse primer sequence (5'-3') | Marker type      | Polymorphism (S.pimp/S.lyc) | Chromosomal Location (SL2.50::chr09) |
|---------|---------------------------------|---------------------------------|------------------|-----------------------------|--------------------------------------|
| xps1857 | TGCACAAAAGCTAA<br>CGAGTTTC      | TGTTGCCATTACCT<br>CTTTCC        | Indel            | 187/160 bp                  | 2,003,568                            |
| xps1858 | TCTGACCACAAATA<br>GCAAACCTCA    | TTGATAAAAATCAT<br>GGTGGAGTG     | Indel            | 176/130                     | 2,947,322                            |
| xps1863 | CCAAGTTTGGTGAA<br>GGCACT        | TGCAAATTTTGAAT<br>TTGATTGA      | Indel            | 155/128                     | 2,224,510                            |
| xps1865 | CCTTCCAACAACCTA<br>CAATGCATAA   | AATTTCTGTCTCTT<br>GATATCTGTACC  | Indel            | 229/202                     | 2,641,373                            |
| xps1866 | AGTGTGTATCTGAT<br>AGAGGTGGAGTG  | CCCAGTTAAGATC<br>GTATAATTTTT    | Indel            | 100/74                      | 3,106,484                            |
| xps1867 | AACAAAAATAAGA<br>CATTTTGCTTCA   | TTTGATAAGGGTA<br>TCGACATTTT     | Indel            | 202/184                     | 3,234,723                            |
| xps1869 | AACGCCTTGAAAAGA<br>GTAAAGACA    | TTGCATTTACAACC<br>ACATCAA       | Indel            | 173/151                     | 3,001,915                            |
| xps1870 | CCCTTTAAACATTT<br>TGTCACACAT    | TTCTGTCCATTTCC<br>TGCAA         | Indel            | 156/137                     | 3,036,073                            |
| xps1882 | GGAAACTCAATAAC<br>TCTCCTAAACC   | CATGGAAGGCGGCT<br>TGTGTATA      | CAPS<br>/EcoRI   | 301 (192/109)               | 3,035,176                            |
| xps1884 | GCATACCCCTCATT<br>TCGATG        | TTCTGTTTGCCTCTA<br>GCCTTT       | CAPS<br>/SpeI    | 442 (161/281)               | 3,011,970                            |
| xps1889 | AAAAAGCCAAAGA<br>GAACACAAT      | GGGGAATCTTGGGA<br>CCTATC        | CAPS<br>/SmaI    | 482 (188/294)               | 3,081,622                            |
| xps1890 | GCGAAGAAGTGAT<br>GCACAAA        | TCAATTCCGAAGAC<br>AATGAAA       | CAPS<br>/NheI    | 410 (38/372)                | 3,094,021                            |
| xps1891 | CACACCCCAAAGGA<br>AAAGAA        | GTCCTTAGGCCCAA<br>CACAAA        | CAPS<br>/BstZ17I | 299 (216/84)                | 3,027,610                            |
| xps1892 | GGATGATCTAGGTG<br>GACCATAA      | GAAAGCCCTGAACC<br>TTTCCT        | CAPS<br>/SacI    | 315 (81/234)                | 3,060,459                            |
| xps1894 | AAATCGGTTAACGA<br>TCAATTTCA     | AATGCATGCTTTTT<br>GGAACC        | CAPS<br>/ScaI    | 298 (20/268)                | 3,028,684                            |
| xps1898 | TGCTCTATGGTGCG<br>AAAATG        | AAGGCATCAAGAG<br>GATGCAC        | CAPS<br>/MfeI    | 268 (114/154)               | 3,044,052                            |
| xps1900 | ATGAAAATGAGAAT<br>TATACGAGAAAAT | TATGGGCTATGGGG<br>TTGAGA        | CAPS<br>/SnaBI   | 322 (193/129)               | 3,049,405                            |
| xps215  | GCCTTTCTCCAGG<br>ATGCTA         | CCCATTTCTCTCTT<br>CCTAGA        | Indel            | 275/225                     | 3,490,540                            |

**Supplementary Table 2 Primers used in this study**

| Gene                                        | Forward primer sequence (5'-3')             | Reverse primer sequence (5'-3')                                                 | Description                                                                                                                                                                          | Size (bp) or position |
|---------------------------------------------|---------------------------------------------|---------------------------------------------------------------------------------|--------------------------------------------------------------------------------------------------------------------------------------------------------------------------------------|-----------------------|
| <b>RACE primers for DTM cDNA cloning</b>    |                                             |                                                                                 |                                                                                                                                                                                      |                       |
| xp3171                                      | AGGCTAAGGAAAAAGGCAGAGT                      |                                                                                 | 3' RACE                                                                                                                                                                              |                       |
| xp3172                                      | TATCACAAAGCTGGTCTAGCAA                      |                                                                                 | 3' RACE                                                                                                                                                                              |                       |
| xp3173                                      | CAATGACTAGATTGGACCCCTTC                     |                                                                                 | 5' RACE                                                                                                                                                                              |                       |
| xp3174                                      | TTCTCCACCATTGTTGTTG                         |                                                                                 | 5' RACE                                                                                                                                                                              |                       |
| xp3171                                      | AGGCTAAGGAAAAAGGCAGAGT                      |                                                                                 | 3' RACE                                                                                                                                                                              |                       |
| <b>Gene editing by CRISPR/Cas9</b>          |                                             |                                                                                 |                                                                                                                                                                                      |                       |
| DTM/Solyc09g009620                          | GATTGGATTTTGATG<br>AAGCATTCT                | AAACAGAATGCTTCA<br>TCAAAATCC                                                    | sgRNA1                                                                                                                                                                               | 236-255               |
| DTM/Solyc09g009620                          | GATTGGGCTGAAAAT<br>GAAAGGCTA                | AAACTAGCCTTTTCAT<br>TTTCAGCCC                                                   | sgRNA2                                                                                                                                                                               | 48-67                 |
| DTL/Solyc11g007100                          | GATTGAAAGCTCAAC<br>GTCTGAACC                | AAACGGTTCAGACGT<br>TGAGCTTTC                                                    | sgRNA1                                                                                                                                                                               | 71-90                 |
| DTL/Solyc11g007100                          | GATTGAATAATCTGA<br>CAGTTACGC                | AAACGCGTAACTGTC<br>AGATTATTC                                                    | sgRNA2                                                                                                                                                                               | 30-49                 |
| SIREV/Solyc11g069470                        | GATTGAGCATAGGGA<br>GAGTAGTAG                | AAACCTACTACTCTC<br>CCTATGCTC                                                    | sgRNA                                                                                                                                                                                | 20-39                 |
| xp4115                                      | GTGGTACCCATTCCGG<br>AGTTTTTGTATCTTGT<br>TTC | ACGAATTCGCCATTT<br>GTCTGCAGAATTGGC                                              | Cloning sgRNA module into psgR-Cas9-At for constructing 2xsgRNA-Cas9                                                                                                                 |                       |
| DTM/Solyc09g009620                          | CCCTTTAAACATTTTG<br>TCACACAT                | AATATTTAACACCCC<br>CAAAATAAA                                                    | mutation identification and genotyping                                                                                                                                               | 514 bp (-146~+345)    |
| DTL/Solyc11g007100                          | CTCAAGGTACTGACC<br>CCCTCT                   | CTGCAGTTCAGTGC<br>CTGACGTTTGT                                                   | mutation identification and genotyping                                                                                                                                               | 440 bp (-209~+231)    |
| SIREV/Solyc11g069470                        | GCTGCTAAGGAAGTA<br>GTTTCAGG                 | CTCAATTGTGTGGCC<br>AAGTG                                                        | mutation identification and genotyping                                                                                                                                               | 3669 bp (-91~+3559)   |
| CAS9                                        | CCCAAGAGGAACAGC<br>GATAAG                   | GGTCGATGGTGGTGT<br>CAAAG                                                        | CAS9-specific primers for genotyping                                                                                                                                                 |                       |
| <b>Yeast Two Hybrid and DTM mutagenesis</b> |                                             |                                                                                 |                                                                                                                                                                                      |                       |
| DTM/mDTM                                    | <u>GAATTC</u> CATGGACAGA<br>ATTAACTCAAAG    | <u>GTCGAC</u> CTTTTTCTTG<br>GATTTTGATGA                                         | To clone into pBD-GAL4 Cam                                                                                                                                                           | 264 bp (1~264)        |
| DTL/Solyc11g007100                          | <u>GTCGACT</u> CATGGAAA<br>AAGAGAATCA       | <u>CTGCAGT</u> TCCAGTGC<br>CTGACGTTTGT                                          | To clone into pBD-GAL4 Cam                                                                                                                                                           | 231bp (1~231)         |
| SIREV/Solyc11g069470                        | <u>GAATTC</u> CATGGCTATG<br>GTGGCTCAACAG    | <u>CTGCAGC</u> ACGAATGA<br>CCAGTTGATAAA                                         | To clone into pAD-GAL4-2.1, full-length                                                                                                                                              | 2523 bp (1~2523)      |
| SIREV-N                                     | GGGGATCCATGGCTA<br>TGGTGGCTCAACAG           | TTTCTCGAGTTAAGC<br>ATAATCAGGAACATC<br>ATAAGGATATACACT<br>TTGCAATTGTTGCCG        | To clone into pAD-GAL4-2.1 for Y2H assay; Also used for amplifying <i>SIREVN</i> cDNA (N-terminal) to be expressed in <i>E. coli</i> ; HA-tag sequence added to the reverse primer   | 1-396 bp (1-132aa)    |
| SIHB15A/Solyc03g120910                      | <u>GAATTC</u> CATGGCTTCC<br>TGCAAGGATGGT    | <u>GTCGAC</u> GACAAATGA<br>CCAGTTGACAAAC                                        | To clone into pAD-GAL4-2.1, full-length                                                                                                                                              | 2508 bp (1~+2508)     |
| SIHB15A-N                                   | GGGGATCCATGGCTT<br>CCTGCAAGGATG             | TTTCTCGAGTTAAGC<br>ATAATCAGGAACATC<br>ATAAGGATAACACT<br>GGTATCTTTCGTAGC<br>AAGT | To clone into pAD-GAL4-2.1 for Y2H assay; Also used for amplifying <i>SIHB15AN</i> cDNA (N-terminal) to be expressed in <i>E. coli</i> ; HA-tag sequence added to the reverse primer | 1-396 bp (1-132aa)    |
| SIPHB/Solyc02g024070                        | <u>GAATTC</u> CATGGCCTTG<br>TGTTTACAGAGAG   | <u>CTCGAGA</u> ACAAAAGA<br>CCAGTTTATGAAC                                        | To clone into pAD-GAL4-2.1, full-length                                                                                                                                              | 2553 bp (1~2553)      |
| SIPHB-N                                     | GGGGATCCATGGCCT<br>TGTGTTTACAGAGAG<br>G     | TTTCTCGAGTTAAGC<br>ATAATCAGGAACATC<br>ATAAGGATACGTGCT<br>GCTAACAGTATTTAT        | To clone into pAD-GAL4-2.1 for Y2H assay; Also used for amplifying <i>SIPHBN</i>                                                                                                     | 1-396 bp (1-132aa)    |

|                                     |                                                       |                                                                                    |                                                                                                                                                                                      |                    |
|-------------------------------------|-------------------------------------------------------|------------------------------------------------------------------------------------|--------------------------------------------------------------------------------------------------------------------------------------------------------------------------------------|--------------------|
|                                     |                                                       | TTGT                                                                               | cDNA (N-terminal) to be expressed in <i>E. coli</i> ; HA-tag sequence added to the reverse primer                                                                                    |                    |
| SIHB15B/Solyc12g044410              | <u>GAATTC</u> CATGTCAATG<br>TCCTGCAAGGAT              | <u>GTCGACA</u> CAACAAACGA<br>CCAATTCACAA                                           | To clone into pAD-GAL4-2.1, full-length                                                                                                                                              | 2511 bp (1~2511)   |
| SIHB15B-N                           | <u>GGGGATCC</u> CATGTCAA<br>TGTCCTGCAAGGATG           | <u>TTTCTCGAGT</u> TAAAGC<br>ATAATCAGGAACATC<br>ATAAGGATAACAGCT<br>GGTGTCTTTCGAAGC  | To clone into pAD-GAL4-2.1 for Y2H assay; Also used for amplifying <i>SIHB15BN</i> cDNA (N-terminal) to be expressed in <i>E. coli</i> ; HA-tag sequence added to the reverse primer | 1-396 bp (1-132aa) |
| SIPHV/Solyc02g069830                | <u>GAATTC</u> CATGGATAGT<br>AGCAAGTATGTGA             | <u>CTCGAGA</u> AATAAAAAGA<br>CCAGTTTGTGAAC                                         | To clone into pAD-GAL4-2.1, full-length                                                                                                                                              | 2502 bp (1~2502)   |
| SIPHV-N                             | <u>GGGGATCC</u> CATGGATA<br>GTAGCAAGTATGTGA<br>GGTA   | <u>TTTCTCGAGT</u> TAAAGC<br>ATAATCAGGAACATC<br>ATAAGGATAACTCAC<br>GACCACAGACTCACAG | To clone into pAD-GAL4-2.1 for Y2H assay; Also used for amplifying <i>SIPHVN</i> cDNA (N-terminal) to be expressed in <i>E. coli</i> ; HA-tag sequence added to the reverse primer   | 1-381 bp (1-127aa) |
| SIHB8/Solyc08g066500                | <u>GGATCC</u> CATGATGGCT<br>GTGACATCAAGC              | <u>CTCGAGG</u> ACAAAAGA<br>CCAATTGATAAAC                                           | To clone into pAD-GAL4-2.1, full-length                                                                                                                                              | 2520 bp (1~2520)   |
| SIHB8-N                             | <u>GGGGATCC</u> CATGATGG<br>CTGTGACATCAAGC            | <u>TTTCTCGAGT</u> TAAAGC<br>ATAATCAGGAACATC<br>ATAAGGATAGTTGTC<br>TGTGGTGGCTAAGGC  | To clone into pAD-GAL4-2.1 for Y2H assay; Also used for amplifying <i>SIHB8N</i> cDNA (N-terminal) to be expressed in <i>E. coli</i> ; HA-tag sequence added to the reverse primer   | 1-396 bp (1-132aa) |
| DTM_L1A                             | AATTGCTACATAATG<br>GCTGAAAA                           | TTGCAAGTAGGCCTT<br>TGAGTT                                                          | To clone into pBD-GAL4 Cam                                                                                                                                                           | 264 bp (1~264)     |
| DTM_I15A                            | ATTGCTACGCAATGG<br>CTGAAAA                            | TTTGCAAGTAGAGCT<br>TTGAGTTAAT                                                      | To clone into pBD-GAL4 Cam                                                                                                                                                           | 264 bp (1~264)     |
| DTM_L22A                            | ATGAAAGGGCAAGG<br>AAAAAGG                             | TTTCAGCCATTATGTA<br>GCAATTTTG                                                      | To clone into pBD-GAL4 Cam                                                                                                                                                           | 264 bp (1~264)     |
| DTM_L29A                            | GCAGAGTTAGCGAAT<br>CAAGAAAAT                          | CTTTTCCCTTAGCCTT<br>TCATTTTC                                                       | To clone into pBD-GAL4 Cam                                                                                                                                                           | 264 bp (1~264)     |
| DTM_L36A                            | AGAAAATCAACAAGC<br>TTTGAGTGA                          | TGATTCAATAACTCT<br>GCCTTTTT                                                        | To clone into pBD-GAL4 Cam                                                                                                                                                           | 264 bp (1~264)     |
| <b><i>In situ</i> hybridization</b> |                                                       |                                                                                    |                                                                                                                                                                                      |                    |
| <i>DTM/Solyc09g009620</i>           | TAATACGACTCACTA<br>TAGGGCGAAATGGAC<br>AGAATTAACTCAAAG | GTCGACCTTTTTCTTG<br>GATTTTGTATGA                                                   | Preparing DNA templates to synthesize sense DTM probe                                                                                                                                | 291 bp (1~291)     |
| <i>DTM/Solyc09g009620</i>           | GAATTCATGGACAGA<br>ATTAACTCAAAG                       | TAATACGACTCACTA<br>TAGGGCGAACTTTTT<br>CTTGATTTTGTATGA                              | Preparing DNA templates to synthesize antisense DTM probe                                                                                                                            | 291 bp (1~291)     |
| <i>SIREV/Solyc11g069470</i>         | TAATACGACTCACTA<br>TAGGGCGAACTTCT<br>CCAGGCTCACCAGA   | TCTTCAGACGACGCA<br>AACAC                                                           | Preparing DNA templates to synthesize sense SIREV probe                                                                                                                              | 416 bp (2059~2474) |
| <i>SIREV/Solyc11g069470</i>         | CTTTCTCCAGGCTCA<br>CCAGA                              | TAATACGACTCACTA<br>TAGGGCGAACTTCTCA<br>GACGACGCAAACAC                              | Preparing DNA templates to synthesize antisense SIREV probe                                                                                                                          | 416 bp (2059~2474) |
| <i>SIWUS/Solyc02g083950</i>         | TAATACGACTCACTA<br>TAGGGCGAATCAGAA<br>CCATAAAGCTCGTGA | GGCACATACCAAATT<br>AGATTAGTACT                                                     | Preparing DNA templates to synthesize sense SIWUS probe                                                                                                                              | 654 bp (228~881)   |
| <i>SIWUS/Solyc02g083950</i>         | TCAGAACCATAAAGC<br>TCGTGA                             | TAATACGACTCACTA<br>TAGGGCGAAGGCACA<br>TACCAAATTAGATTA<br>GTACT                     | Preparing DNA templates to synthesize antisense SIWUS probe                                                                                                                          | 654 bp (228~881)   |
| <i>SICLV3/Solyc</i>                 | TAATACGACTCACTA                                       | GGGCCAAAAACAACA                                                                    | Preparing DNA                                                                                                                                                                        | 349 bp             |

|                                    |                                                        |                                                                                                   |                                                                    |                       |
|------------------------------------|--------------------------------------------------------|---------------------------------------------------------------------------------------------------|--------------------------------------------------------------------|-----------------------|
| <i>11g071380</i>                   | TAGGGCGAAAATCTC<br>TTTGTCTTGCTGATCT<br>GT              | AAAAC                                                                                             | templates to synthesize<br>sense SICLV3 probe                      | (28~376)              |
| <i>SICLV3/Solyc<br/>11g071380</i>  | AATCTCTTTGTCTTGC<br>TGATCTGT                           | TAATACGACTCACTA<br>TAGGGCGAA<br>GGGCCAAAAACAACA<br>AAAAC                                          | Preparing DNA<br>templates to synthesize<br>antisense SICLV3 probe | 349 bp (28-376)       |
| <i>SISTM/Solyc0<br/>2g081120</i>   | TAATACGACTCACTA<br>TAGGGCGAATGGTGG<br>ATTGGTGGCTTAGA   | TGTACTACTACATGC<br>ACACAAGT                                                                       | Preparing DNA<br>templates to synthesize<br>sense SISTM probe      | 322 bp<br>(818~1139)  |
| <i>SISTM/Solyc0<br/>2g081120</i>   | TGGTGGATTGGTGGC<br>TTAGA                               | TAATACGACTCACTA<br>TAGGGCGAATGTACT<br>ACTACATGCACACAA<br>GT                                       | Preparing DNA<br>templates to synthesize<br>antisense SISTM probe  | 322 bp<br>(818~1139)  |
| <b>qRT-PCR</b>                     |                                                        |                                                                                                   |                                                                    |                       |
| <i>Slc1F4a6</i>                    | CAGCTTTTGGCACCA<br>AAAAT                               | TCTGATCCATGTCTCC<br>GTGA                                                                          | reference gene                                                     | 350 bp                |
| <i>DTM/Solyc09<br/>g009620</i>     | GAATTCATGGACAGA<br>ATTAAC TCAAAG                       | GTCGACCTTTTCTTG<br>GATTTTGTATGA                                                                   |                                                                    | 267 bp (1~267)        |
| <i>SIREV/Solyc<br/>11g069470</i>   | CTAAAGAATCTCTGG<br>CAACACC                             | TTGATAAACGAAAAAG<br>GCCAAA                                                                        |                                                                    | 338 bp<br>(2173~2510) |
| <i>SIWUS/Solyc<br/>02g083950</i>   | TCTCCAGCAACTTAC<br>CCTTTTC                             | TCCAAATAGCTTGGC<br>ACATAC                                                                         |                                                                    | 326 bp<br>(571~896)   |
| <i>SICLV3/Solyc<br/>c11g071380</i> | AATCTCTTTGTCTTGC<br>TGATCTGT                           | GGGCCAAAAACAACA<br>AAAAC                                                                          |                                                                    | 349 bp<br>(28~376)    |
| <i>SISTM/Solyc<br/>02g081120</i>   | TGGTGGATTGGTGGC<br>TTAGA                               | TGTACTACTACATGC<br>ACACAAGT                                                                       |                                                                    | 322 bp<br>(818~1139)  |
| <b>Pulldown assay</b>              |                                                        |                                                                                                   |                                                                    |                       |
| <i>DTM/Solyc09<br/>g009620</i>     | B-DTM-F:<br><u>GGATCCATGGACAGA</u><br>ATTAAC TCAAAG    | X-cmyc-DTM-R:<br><u>CTCGAGTTAAAGATC</u><br>TTCTTCAGAAATAAG<br>TTTTTGTTCCTTTTTC<br>TTGGATTTTGTATGA | cmyc sequence was<br>added to the reverse<br>primer                | 264 bp (1~264)        |
| <i>SIREV/Solyc<br/>11g069470</i>   | B-69470-F:<br><u>GGATCCATGGCTATG</u><br>GTGGCTCAACAG   | X-HA-69470-R:<br><u>CTCGAGTTAAGCATA</u><br>ATCAGGAACATCATA<br>AGGATACACGAATGA<br>CCAGTTGACATAA    | HA-tag sequence added<br>to the reverse primer                     | 2523 bp<br>(1~2523)   |
| <i>SIPHV/Solyc<br/>02g069830</i>   | B-069830-F:<br><u>GGATCCATGGATAGT</u><br>AGCAAGTATGTGA | X-HA-069830-R:<br><u>CTCGAGTTAAGCATA</u><br>ATCAGGAACATCATA<br>AGGATAAATAAAAGA<br>CCAGTTTGTGAAC   | HA-tag sequence added<br>to the reverse primer                     | 2502 bp<br>(1~2502)   |
| <i>SIHB8/Solyc0<br/>8g066500</i>   | B-066500-F:<br><u>GGATCCATGATGGCT</u><br>GTGACATCAAGC  | X-HA-066500-R:<br><u>CTCGAGTTAAGCATA</u><br>ATCAGGAACATCATA<br>AGGATAGACAAAAG<br>ACCAATTGATAAAC   | HA-tag sequence added<br>to the reverse primer                     | 2520 bp<br>(1~2520)   |
| <i>SIHB15A/Sol<br/>yc03g120910</i> | B-120910-F:<br><u>GGATCCATGGCTTCCT</u><br>GCAAGGATGGT  | H-HA-120910-R:<br><u>AAGCTTTTAAGCATA</u><br>ATCAGGAACATCATA<br>AGGATAGACAAAATGA<br>CCAGTTGACATAA  | HA-tag sequence added<br>to the reverse primer                     | 2508 bp<br>(1~2508)   |
| <i>SIHB15B/Sol<br/>yc12g044410</i> | B-44410-F:<br><u>GGATCCATGTCAATG</u><br>TCCTGCAAGGAT   | X-HA-44410-R:<br><u>CTCGAGTTAAGCATA</u><br>ATCAGGAACATCATA<br>AGGATAAACAAAACGA<br>CCAATTCACAA     | HA-tag sequence added<br>to the reverse primer                     | 2511 bp<br>(1~2511)   |
| <i>SIPHB/Solyc0<br/>2g024070</i>   | B-24070-F:<br><u>GGATCCATGGCCTTG</u><br>TGTTTACAGAGAG  | X-HA-24070-R:<br><u>CTCGAGTTAAGCATA</u><br>ATCAGGAACATCATA<br>AGGATAAACAAAAG<br>ACCAGTTTATGAAC    | HA-tag sequence added<br>to the reverse primer                     | 2553bp<br>(1~2553)    |
| <i>DTL/Solyc11<br/>g007100</i>     | DTL-BamHI-F:<br><u>GGATCCATGGAAAA</u>                  | DTL-XhoI-CMYC-R:<br><u>CTCGAGTTAAAGATC</u>                                                        | cmyc-tag sequence<br>added to the reverse                          | 231bp (1~231)         |

|                                                              |                                                                                                            |                                                                                            |                                                                                                                            |                     |
|--------------------------------------------------------------|------------------------------------------------------------------------------------------------------------|--------------------------------------------------------------------------------------------|----------------------------------------------------------------------------------------------------------------------------|---------------------|
|                                                              | GAGAATTCAGA                                                                                                | TTCTTCAGAAATAAG<br>TTTTTGTCTTCCAGT<br>GCCTGACGTTTGT                                        | primer                                                                                                                     |                     |
| <b>Bimolecular fluorescence complementation (BiFC) assay</b> |                                                                                                            |                                                                                            |                                                                                                                            |                     |
| DTM/DTM_L<br>8F                                              | <u>GGTACCATGGACAGA</u><br>ATTAACTCAAAG                                                                     | <u>GTCGACCTTTTCTTG</u><br>GATTTTGATGA                                                      | To clone into pJW771                                                                                                       | 264 bp (1~264)      |
| SIREV/Solyc<br>11g069470                                     | <u>GGTACCATGGCTATG</u><br>GTGGCTCAACAGC                                                                    | <u>CTGCAGTTACACGAA</u><br>TGACCAGTTGATAA                                                   | To clone into pJW772                                                                                                       | 2526 bp<br>(1~2526) |
| SIHB15B/Sol<br>yc12g044410                                   | <u>CCGGGATCCAATGTC</u><br>AATGTCCTGCAAGGA<br>T                                                             | <u>CAGGTTCGACTTAAAC</u><br>AAACGACCAATTCAC                                                 | To clone into pJW772                                                                                                       | 2514 bp<br>(1~2514) |
| SIHB15A/Sol<br>yc03g120910                                   | <u>AAAGGTACCATGGCT</u><br>TCCTGCAAGGATGGT                                                                  | <u>AACGTCGACTTAGAC</u><br>AAATGACCAGTTGAC                                                  | To clone into pJW772                                                                                                       | 2511 bp<br>(1~2511) |
| SIPHB/Solyc0<br>2g024070                                     | <u>GTAGGTACCATGGCC</u><br>TTGTGTTTACAGAGA                                                                  | <u>AACGGATCCTTAAAC</u><br>AAAAGACCAGTTTAT                                                  | To clone into pJW772                                                                                                       | 2556 bp<br>(1~2556) |
| SIPHV/Solyc<br>02g069830                                     | <u>GAGGGTACCATGGAT</u><br>AGTAGCAAGTATGTG                                                                  | <u>AACGGATCCTTAAAT</u><br>AAAAGACCAGTTTGT                                                  | To clone into pJW772                                                                                                       | 2505 bp<br>(1~2505) |
| SIHB8/Solyc0<br>8g066500                                     | <u>GTGGGTACCATGATG</u><br>GCTGTGACATCAAGC                                                                  | <u>ATAGGATCCTCAGAC</u><br>AAAAGACCAATTGAT                                                  | To clone into pJW772                                                                                                       | 2523 bp<br>(1~2523) |
| <b>EMSA assay</b>                                            |                                                                                                            |                                                                                            |                                                                                                                            |                     |
| DTM/Solyc09<br>g009620                                       | DTM- <i>in vitro</i> -F:<br><u>GCGATCGCTATTTAG</u><br>GTGACACTATAGAAC<br>AGACCACCATGGACA<br>GAATTAACTCAAAG | DTM- <i>in vitro</i> -R:<br>GTTTAAACTTAAAGA<br>TCTTCTCAGAAATA                              | Preparing DNA<br>template for<br>synthesizing protein in<br>TnT™ SP6 High-Yield<br>Wheat Germ Protein<br>Expression System | 264 bp (1~264)      |
| SIREV/Solyc<br>11g069470                                     | E-REV-KOZAK-F:<br><u>GGGAATTCGCCACCA</u><br>TGGCTATGGTGGCTC<br>AACAG                                       | K-REV-HA-N-R:<br>GGGGTACCTTAAAGCA<br>TAATCAGGAACATCA<br>TAAGGATATGTGGGA<br>GCATATATCTGGGTA | Cloning of SIREV (1-<br>265aa) into TNT<br>expression vector                                                               | 795 bp (1~795)      |
